# Supplementary material for: Altered Plasma Apolipoprotein Modifications in Patients with Pancreatic Cancer: Protein Characterization and Multi-Institutional Validation
Source: PLOS journal article supplement (doi:10.1371/journal.pone.0046908), 2012-10-08
Supplement: S4 (10.1371/journal.pone.0046908.s004) [file journal.pone.0046908.s004]

## Supplementary Figure S4

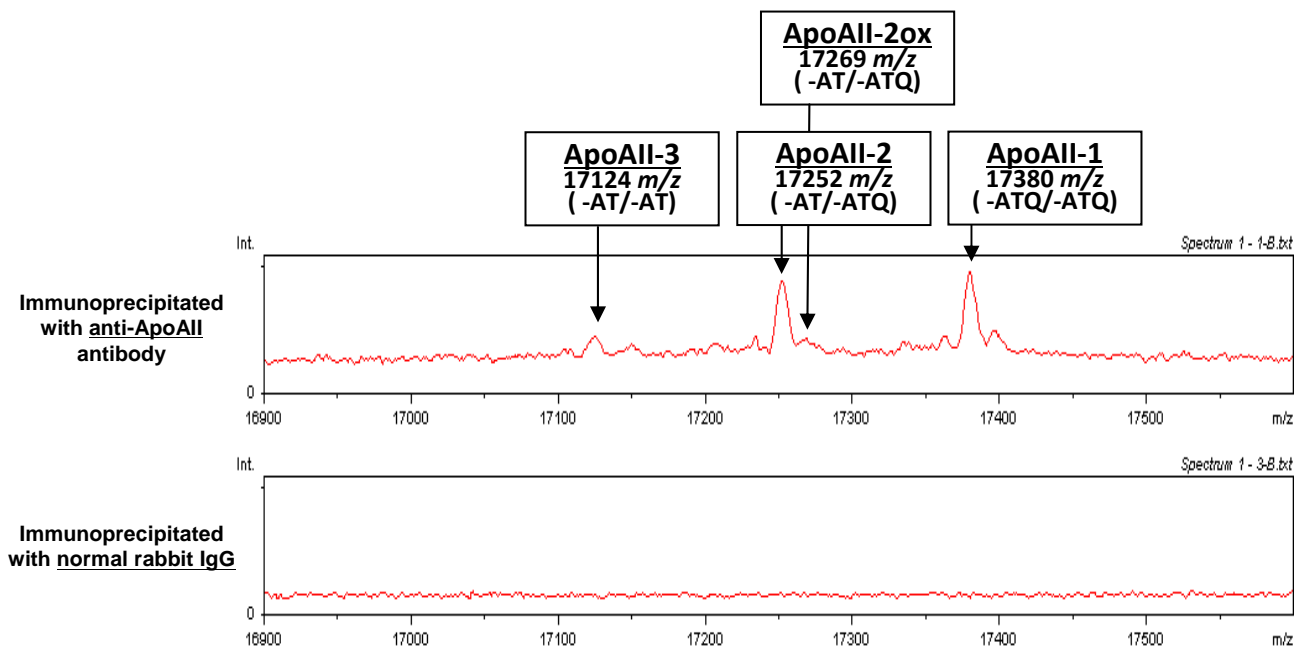

### Supplementary Figure S4. Confirmation of protein identity by immunoprecipitation and MS.

A plasma mixture from healthy volunteers was immunoprecipitated with anti-ApoAII antibody or normal rabbit IgG (negative control), and the precipitated proteins were analyzed by oMALDI-QqTOF-MS.
