# Supplementary material for: Altered Plasma Apolipoprotein Modifications in Patients with Pancreatic Cancer: Protein Characterization and Multi-Institutional Validation
Source: PLOS journal article supplement (doi:10.1371/journal.pone.0046908), 2012-10-08
Supplement: S7 (10.1371/journal.pone.0046908.s007) [file journal.pone.0046908.s007]

**Supplementary Table S1. Clinical characteristics of individuals in Cohorts 1 to 3**

| Collection period      | Cohort 1 ( <i>n</i> = 215)<br>(2002-2005) |                   |                     | Cohort 2 ( <i>n</i> = 103)<br>(2003-2005) |                   |                     | Cohort 3 ( <i>n</i> = 163)<br>(2003-2006) |                   |                       |                      |                      |
|------------------------|-------------------------------------------|-------------------|---------------------|-------------------------------------------|-------------------|---------------------|-------------------------------------------|-------------------|-----------------------|----------------------|----------------------|
|                        | Healthy control                           | Pancreatic cancer | <i>P</i> -value     | Healthy control                           | Pancreatic cancer | <i>P</i> -value     | Healthy control                           | Pancreatic cancer | <i>P</i> -value       | Chronic pancreatitis | <i>P</i> -value      |
| <b>Number of cases</b> | 112                                       | 103               |                     | 41                                        | 62                |                     | 53                                        | 52                |                       | 58                   |                      |
| <b>Age (mean ± SD)</b> | 61.3 ± 13.0                               | 61.5 ± 9.67       | 0.8795 <sup>a</sup> | 61.5 ± 11.2                               | 63.3 ± 8.34       | 0.3729 <sup>a</sup> | 39.1 ± 15.6                               | 63.1 ± 9.85       | 4.67E-15 <sup>a</sup> | 50.3 ± 8.93          | 9.08E-6 <sup>a</sup> |
| <b>Gender</b>          |                                           |                   | 0.7134 <sup>b</sup> |                                           |                   | 0.5996 <sup>b</sup> |                                           |                   | 0.7785 <sup>b</sup>   |                      | 0.0807 <sup>b</sup>  |
| Male                   | 57                                        | 55                |                     | 23                                        | 38                |                     | 31                                        | 29                |                       | 43                   |                      |
| Female                 | 55                                        | 48                |                     | 18                                        | 24                |                     | 22                                        | 23                |                       | 15                   |                      |

<sup>a</sup>Student *t*-test

<sup>b</sup>χ<sup>2</sup> test
